# Supplementary material for: Hydrothermal growth of ferrous hydroxide terephthalate as a new positive electrode material for supercapacitors
Source: Royal Society of Chemistry journal article supplement (doi:10.1039/c8dt02377h), 2018-01-01
Supplement: c8dt02377h1.pdf [file c8dt02377h1.pdf]

## **Electronic Supplementary Information**

### **Hydrothermal growth of ferrous hydroxide terephthalate as a new positive electrode material for supercapacitors**

Xiuling Ou, Shuijin Lei,\* Xinlai Zhang, Kun Wan, Yifan Wang, Wei Zhou, Yanhe

Xiao and Baochang Cheng

*School of Materials Science and Engineering, Nanchang University, Nanchang,*

*Jiangxi 330031, P. R. China*

\* To whom correspondence should be addressed. E-mail: [shjlei@ncu.edu.cn](mailto:shjlei@ncu.edu.cn)

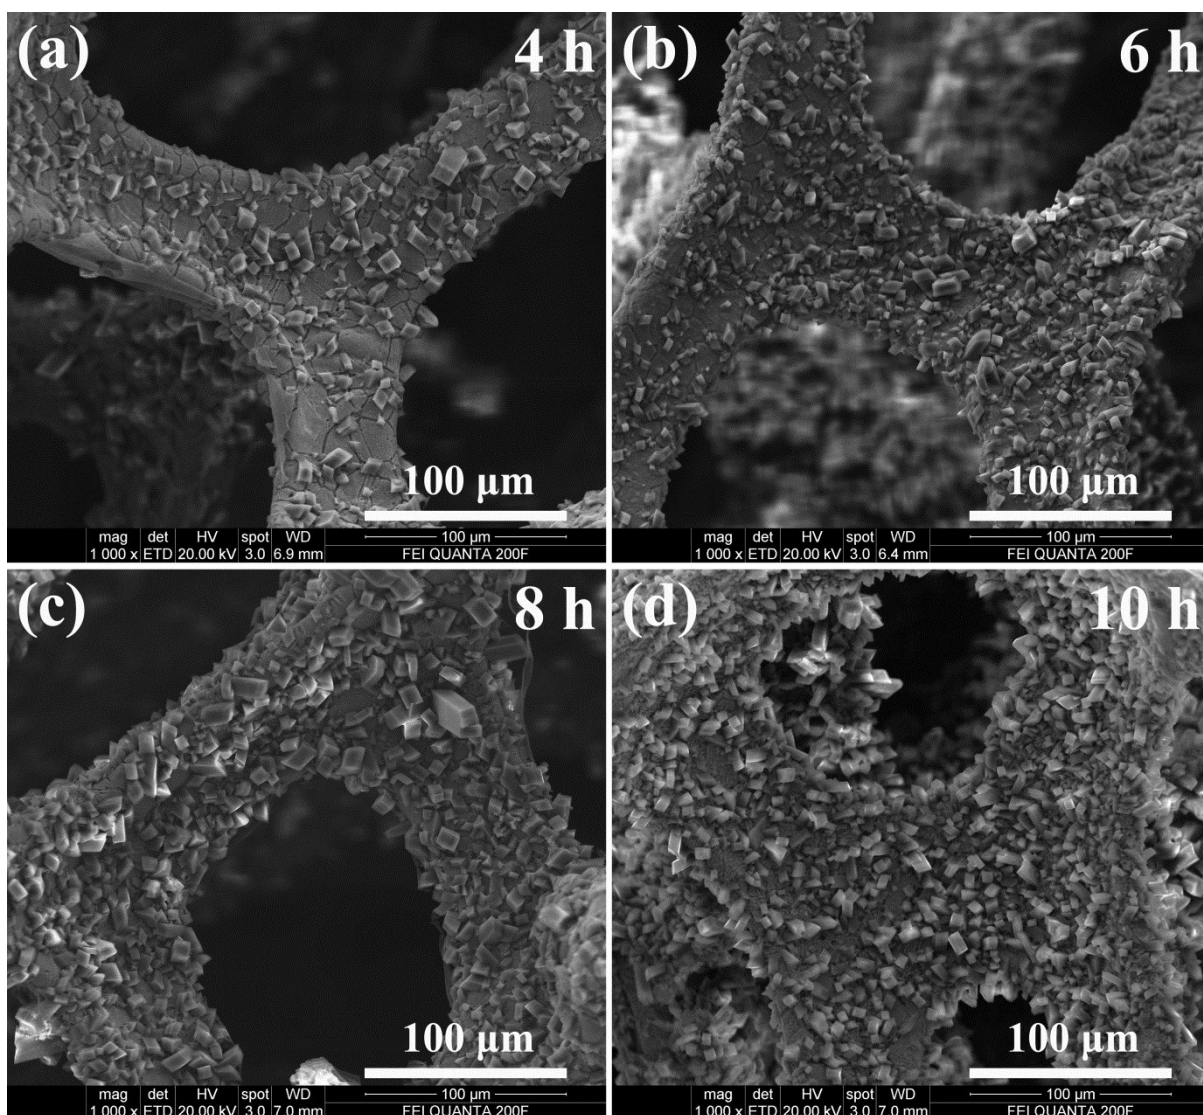

**Fig. S1** SEM images of the comparative Fe(OH)(Tp) samples prepared for different reaction time with different mass loading: (a) 4 h, (b) 6 h, (c) 8 h, and (d) 10 h.

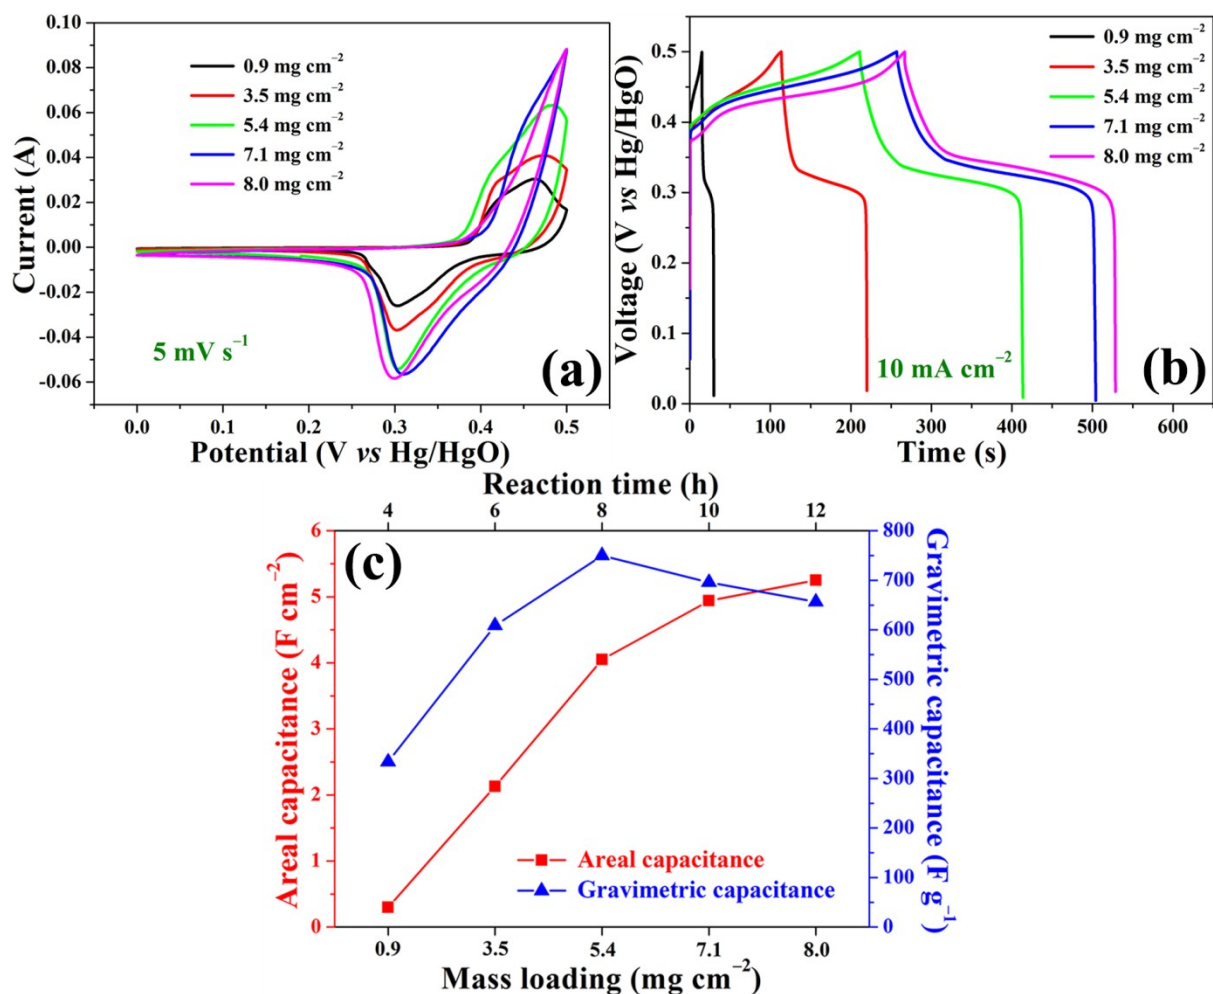

**Fig. S2** (a) CV curves recorded at a scan rate of 5 mV s<sup>-1</sup>, (b) GCD curves measured at a current density of 10 mA cm<sup>-2</sup>, and (c) the areal and gravimetric specific capacitances of the Fe(OH)(Tp) electrodes as a function of the mass loading of the Fe(OH)(Tp) samples prepared for different reaction time.

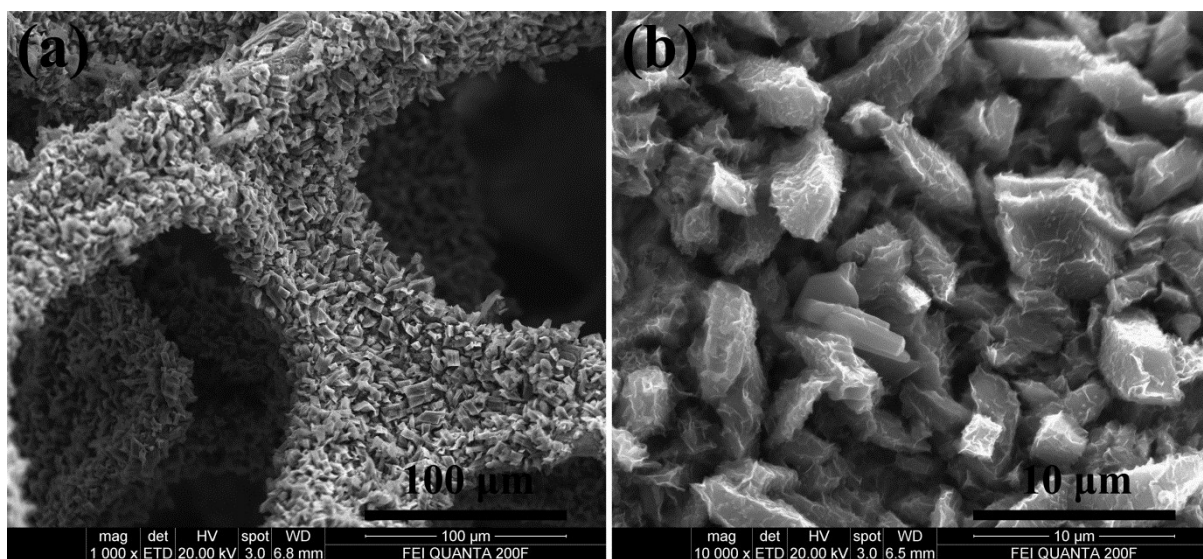

**Fig. S3** (a) Low-magnification and (b) high-magnification SEM images of the Fe(OH)(Tp) electrode materials after cycling test.

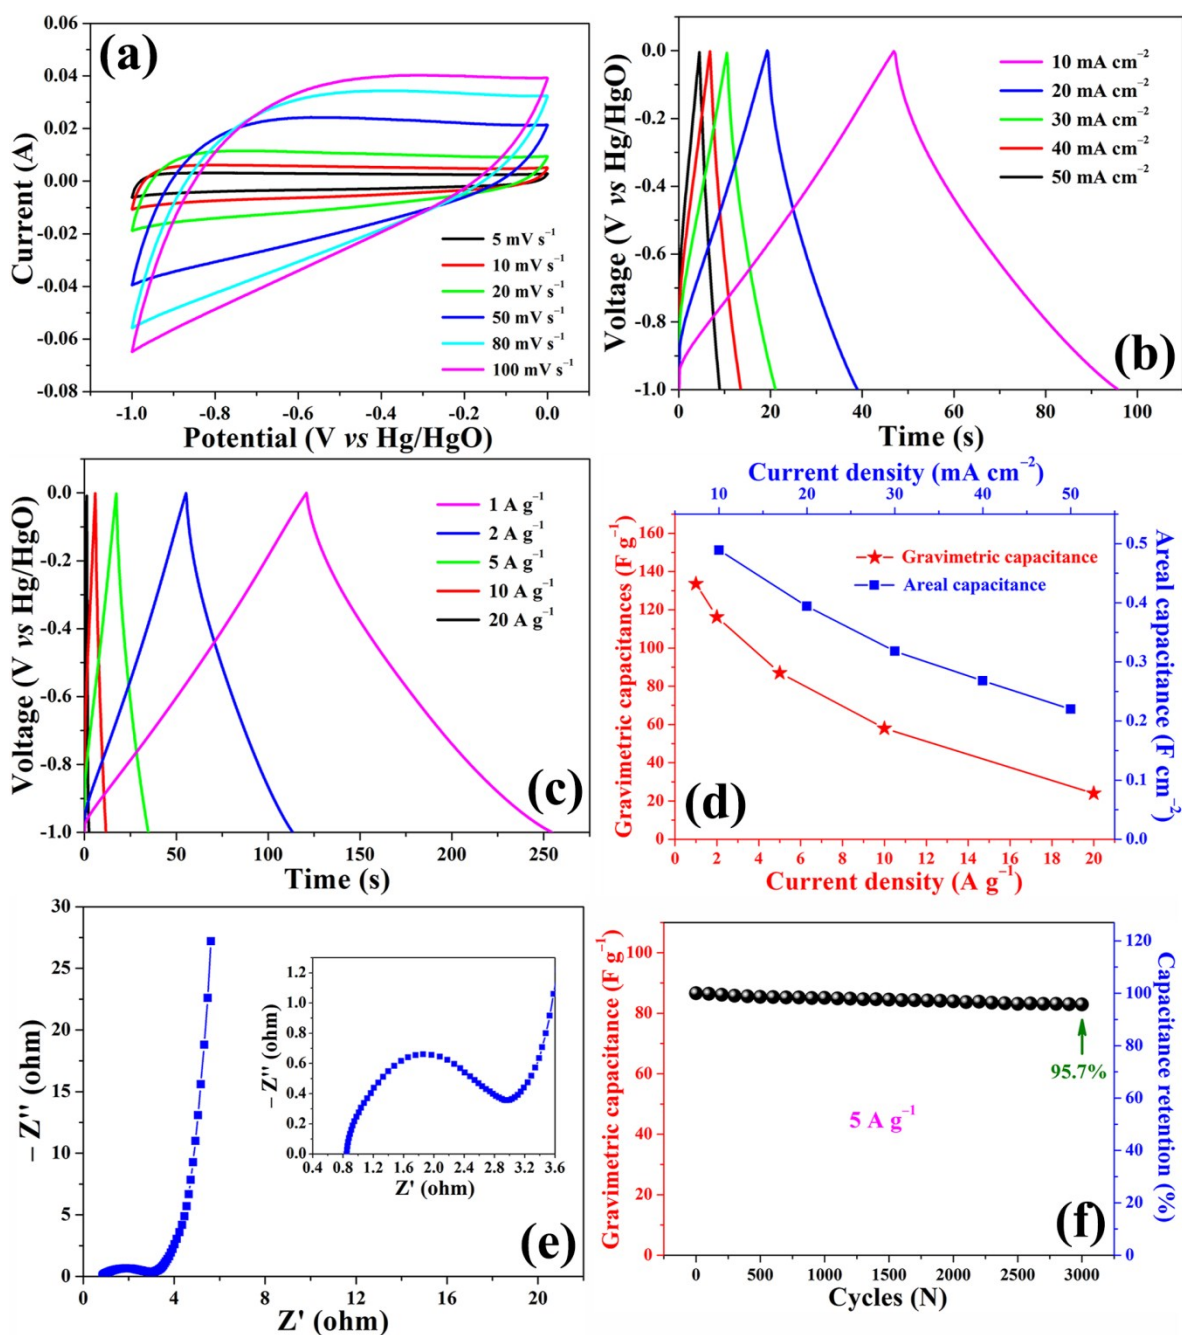

**Fig. S4** Electrochemical behaviors of the activated carbon negative electrode in 3 M KOH aqueous electrolyte with a three-electrode model: (a) CV curves at different scan rates; (b) GCD curves at different areal current densities; (c) GCD curves at different gravimetric current densities; (d) the gravimetric and areal specific capacitances of the carbon electrode as a function of the current density; (e) EIS Nyquist plots; (f) cycling stability of the carbon electrode over 3000 cycles at a current density of 40 mA cm<sup>-2</sup>.

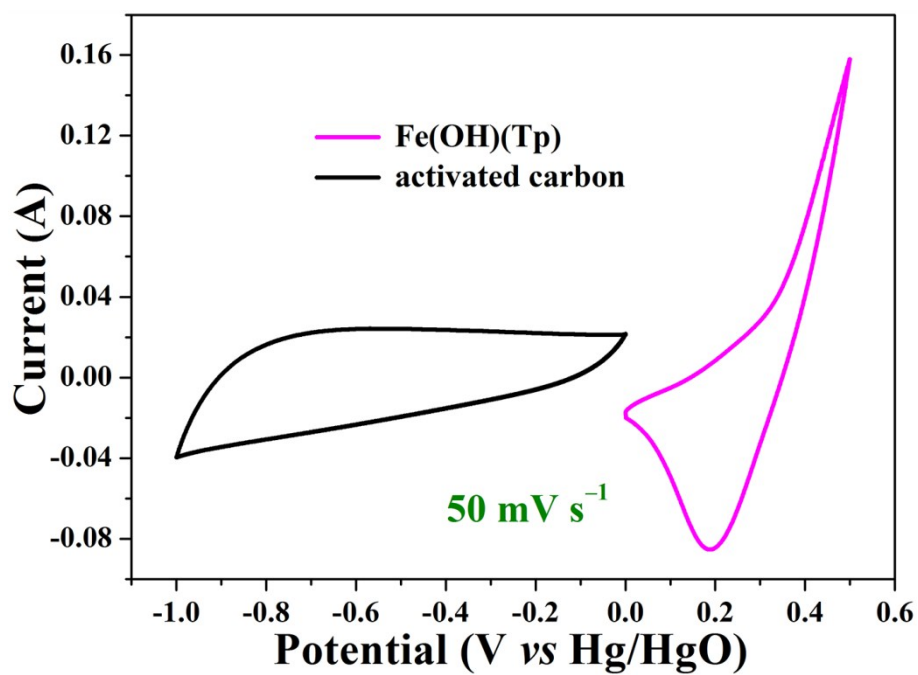

**Fig. S5** The contrastive CV curves of the Fe(OH)(Tp) positive electrode and the activated carbon negative electrode at a scan rate of 50 mV s<sup>-1</sup>.

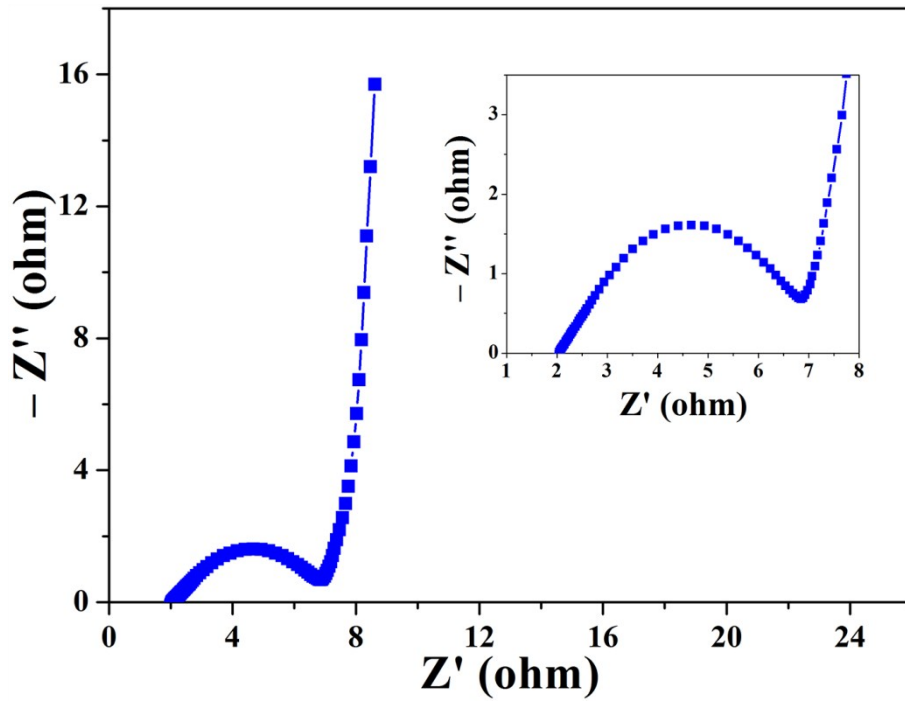

**Fig. S6** Nyquist plots of the assembled asymmetric supercapacitor device.
